# Supplementary figures and images for: CTRP7 Is a Biomarker Related to Insulin Resistance and Oxidative Stress: Cross‐Sectional and Intervention Studies In Vivo and In Vitro
Source: Hindawi journal article supplement (doi:10.1155/2022/6877609), 2022-01-01

A

## ROC curve

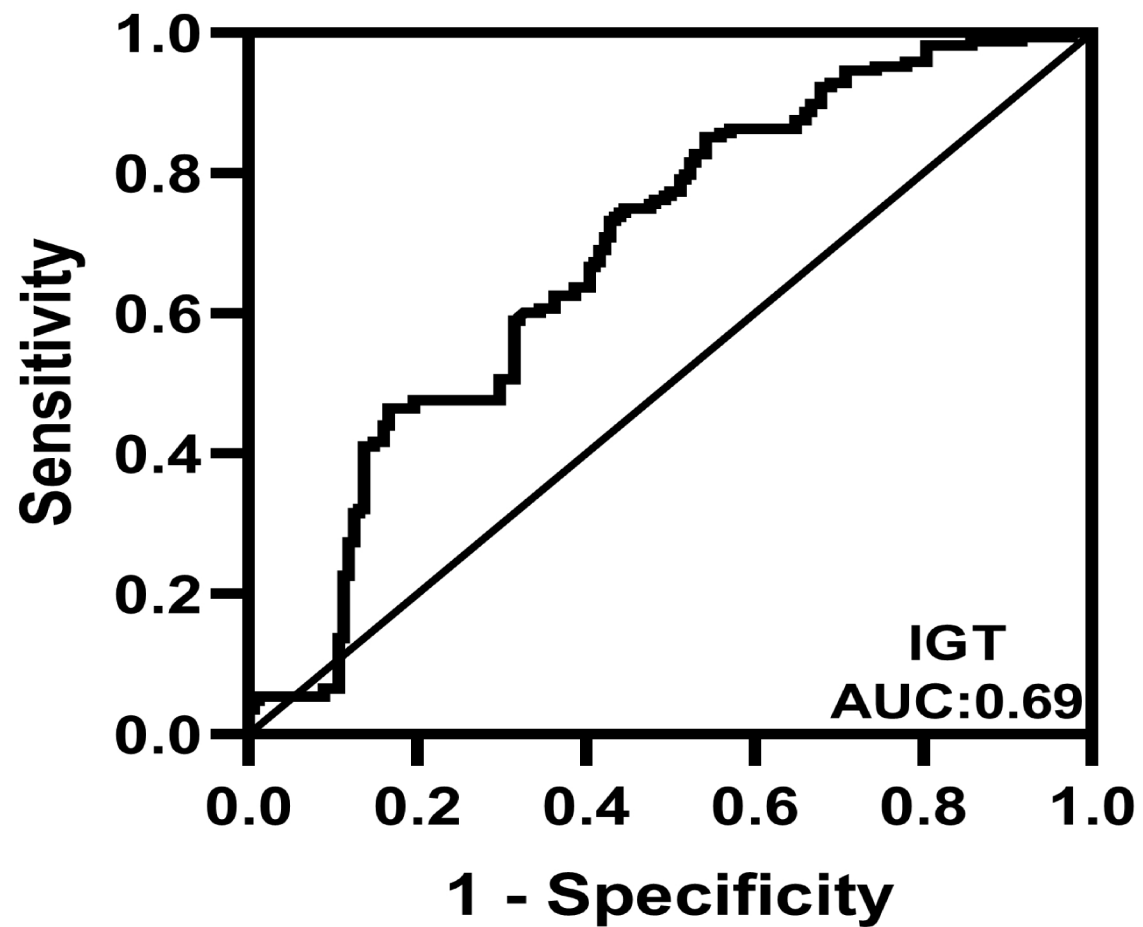

B

## ROC curve

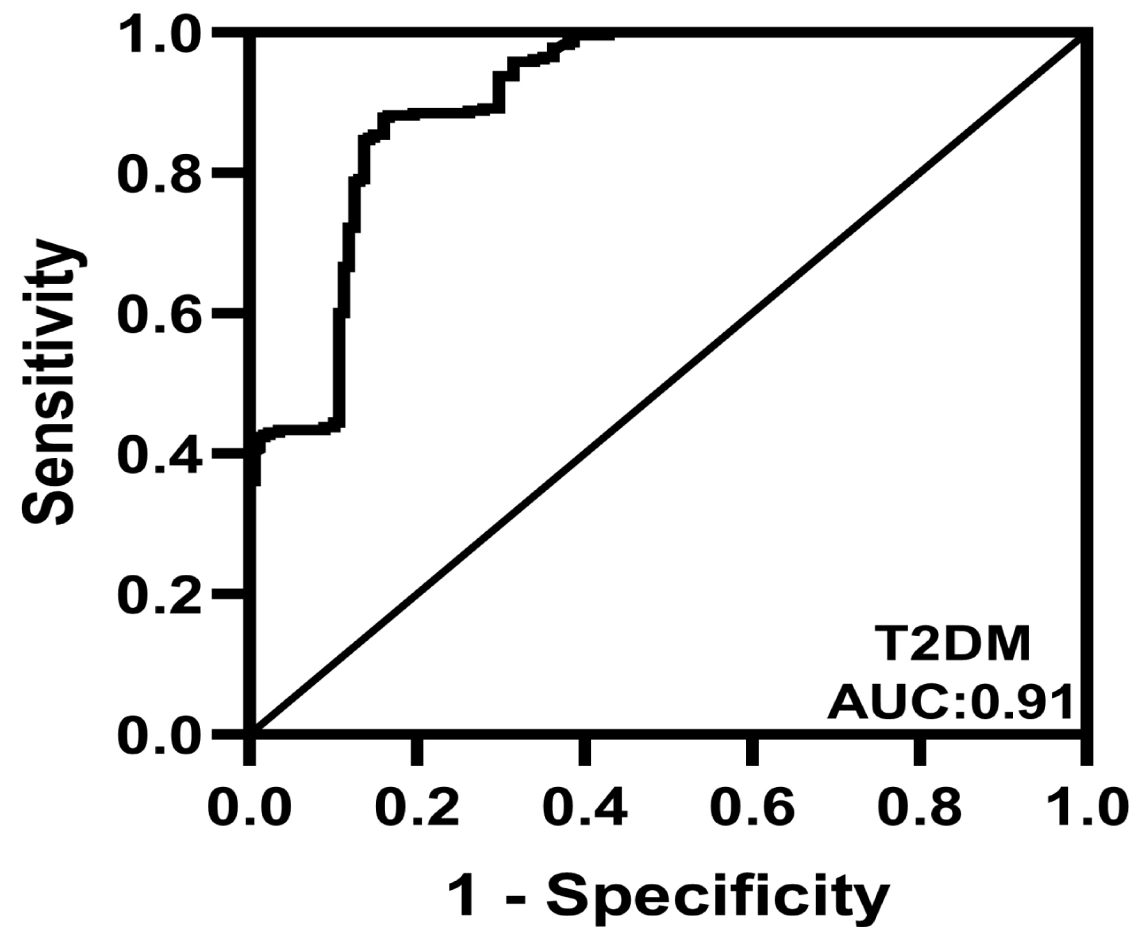

Supplement: f1 [file 6877609.f1.zip]

**A**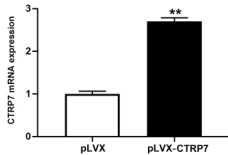**B**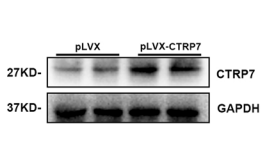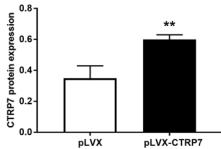

Supplement: f1 [file 6877609.f1.zip]

A

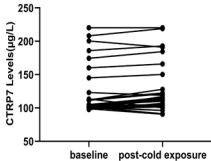

B

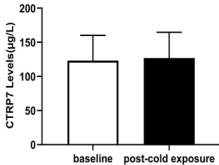

Supplement: f1 [file 6877609.f1.zip]

**A**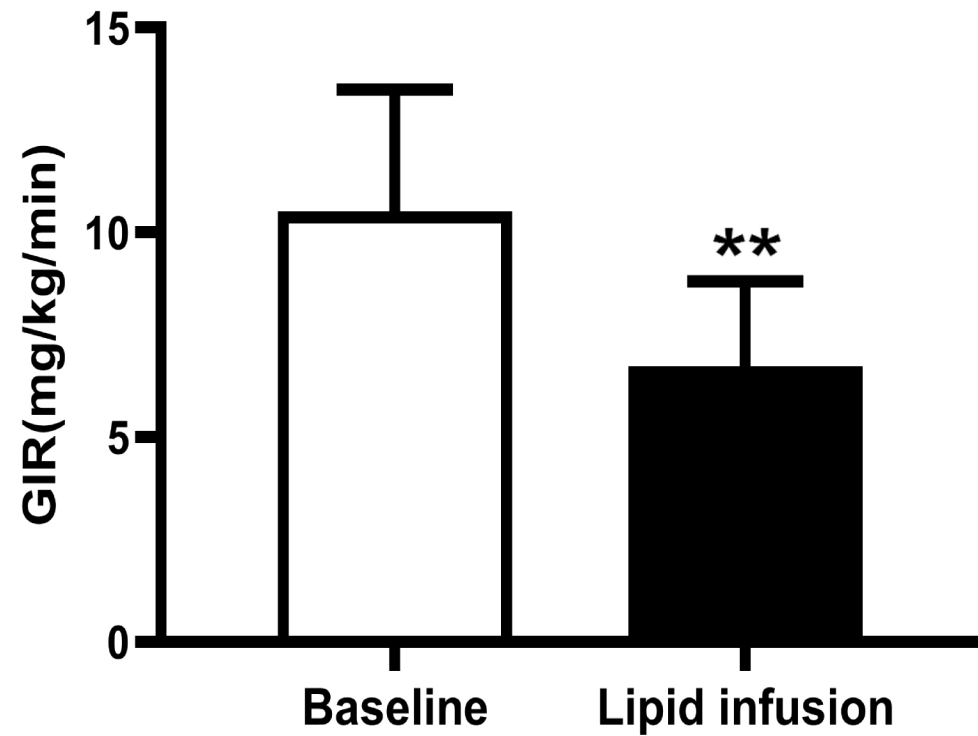**B**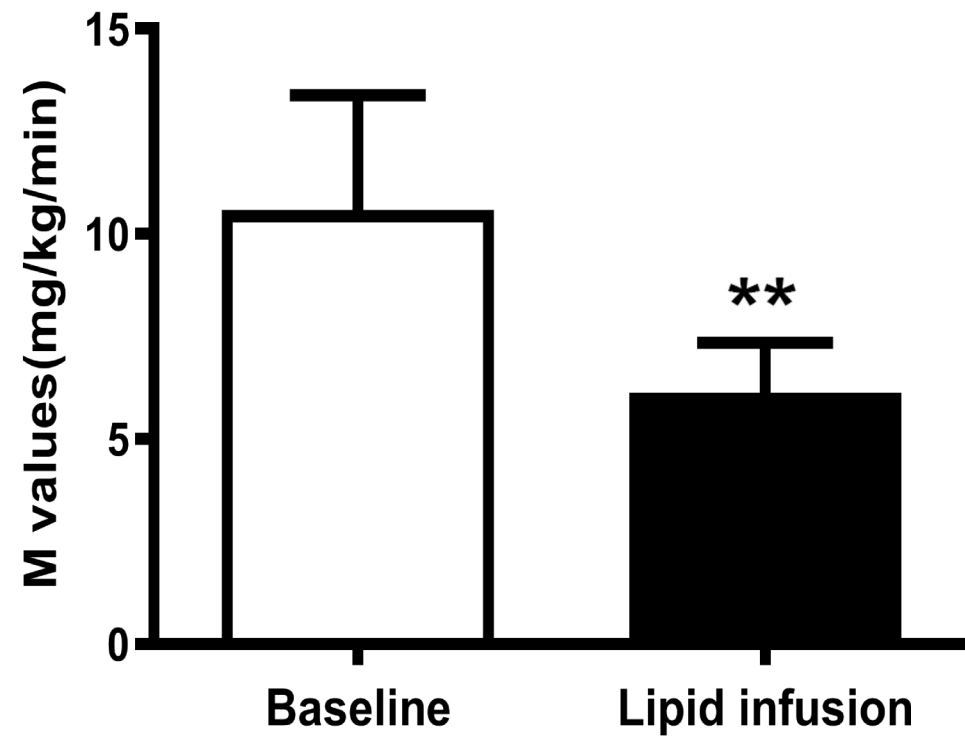

Supplement: f1 [file 6877609.f1.zip]
